# Supplementary material for: Evaluation of Gastric Emptying Time of a Rice-Based Meal Using Serial Sonography
Source: Hindawi journal article supplement (doi:10.1155/2019/5917085), 2019-10-28
Supplement: f1 [file 5917085.f1.pdf]

**Table S1.** Interrater variability of CAS in two investigators

|                                                | Baseline<br>(after 10 h<br>fasting) | Time after meal intake (h) |               |               |              |              |              |  |
|------------------------------------------------|-------------------------------------|----------------------------|---------------|---------------|--------------|--------------|--------------|--|
|                                                |                                     | 2 h                        | 3 h           | 4 h           | 5 h          | 6 h          | 7 h          |  |
| CSA by formula<br>(cm <sup>2</sup> )           |                                     |                            |               |               |              |              |              |  |
| Radiologist                                    | 5.0 ± 1.5                           | 11.6 ±<br>3.7              | 11.5 ±<br>2.7 | 10.2 ±<br>2.4 | 7.2 ±<br>2.9 | 5.5 ±<br>1.5 | 6.1 ±<br>4.6 |  |
| Anesthesiologist                               | 4.2 ± 1.4                           | 13.9 ±<br>6.6              | 10.8 ±<br>4.2 | 9.6 ±<br>3.4  | 6.7 ±<br>2.4 | 4.9 ±<br>1.2 | 5.3 ±<br>2.9 |  |
| P-value                                        | 0.340                               | 0.605                      | 0.666         | 0.730         | 0.863        | >0.999       | >0.999       |  |
| CSA by automatic<br>tracing (cm <sup>2</sup> ) |                                     |                            |               |               |              |              |              |  |
| Radiologist                                    | 5.2 ± 1.4                           | 12.0 ±<br>3.7              | 11.8 ±<br>2.7 | 10.6 ±<br>2.3 | 7.3 ±<br>3.0 | 5.6 ±<br>1.5 | 6.5 ±<br>4.7 |  |
| Anesthesiologist                               | 3.9 ± 1.1                           | 12.6 ±<br>5.2              | 10.9 ±<br>3.9 | 10.0 ±<br>3.5 | 6.9 ±<br>2.6 | 5.0 ±<br>1.1 | 5.1 ±<br>3.1 |  |
| P-value                                        | 0.063                               | 0.796                      | 0.489         | 0.796         | 0.796        | >0.999       | 0.667        |  |

**Table S2.** Gastric emptying time (hour) measured by the two investigators

| Volunteer number | Investigator 1<br>(radiologist) | Investigator 2<br>(anesthesiologist) |
|------------------|---------------------------------|--------------------------------------|
| 1                | 6                               | 6                                    |
| 2                | 7                               | 7                                    |
| 3                | 6                               | 6                                    |
| 4                | 7                               | 7                                    |
| 5                | 5                               | 5                                    |
| 6                | 5                               | 5                                    |
| 7                | 5                               | 5                                    |
| 8                | 6                               | 6                                    |
| 9                | 5                               | 5                                    |
